# Supplementary material for: Autotetraploid Origin of Chinese Cherry Revealed by Chromosomal Karyotype and In Situ Hybridization of Seedling Progenies
Source: MDPI journal article supplement (doi:10.3390/plants12173116), 2023-08-30
Supplement: s1 [file s1]

**Table S1.** Chromosome parameters in polyploid Chinese cherry.

| Code | Chr. no. | Relative length (%) | Index of relative length | Arm ratio | Centromere index | Type | Code | Chr. no. | Relative length (%) | Index of relative length | Arm ratio | Centromere index | Type |
|------|----------|---------------------|--------------------------|-----------|------------------|------|------|----------|---------------------|--------------------------|-----------|------------------|------|
| MY3  | 1        | 7.80+12.03=19.82    | 1.59                     | 1.54      | 39.33            | m    | LY4  | 1        | 7.95+14.46=22.42    | 1.69                     | 1.82      | 35.48            | sm   |
|      | 2        | 6.38+7.09=13.47     | 1.08                     | 1.11      | 47.38            | m    |      | 2        | 6.35+6.90=13.25     | 1.14                     | 1.09      | 47.92            | m    |
|      | 3        | 4.55+8.79=13.34     | 1.07                     | 1.93      | 34.09            | m    |      | 3        | 4.54+8.26=12.80     | 1.02                     | 1.82      | 35.45            | sm   |
|      | 4        | 5.41+6.17=11.58     | 0.93                     | 1.14      | 46.73            | m    |      | 4        | 5.29+6.05=11.34     | 0.92                     | 1.14      | 46.65            | m    |
|      | 5        | 4.17+7.29=11.45     | 0.92                     | 1.75      | 36.38            | m    |      | 5        | 4.22+6.78=11.00     | 0.86                     | 1.61      | 38.39            | m    |
|      | 6        | 4.98+5.68=10.66     | 0.85                     | 1.14      | 46.71            | m    |      | 6        | 4.83+5.47=10.30     | 0.83                     | 1.13      | 46.93            | m    |
|      | 7        | 4.29+6.23=10.52     | 0.84                     | 1.45      | 40.81            | m    |      | 7        | 4.25+5.27=9.53      | 0.82                     | 1.24      | 44.65            | m    |
|      | 8        | 3.89+5.27=9.16      | 0.73                     | 1.36      | 42.42            | m    |      | 8        | 4.01+5.36=9.37      | 0.76                     | 1.34      | 42.80            | m    |
| MZ3  | 1        | 8.00+12.07=20.06    | 1.60                     | 1.51      | 39.86            | m    | BZ   | 1        | 7.95+11.74=19.69    | 1.58                     | 1.48      | 40.39            | m    |
|      | 2        | 6.44+7.16=13.60     | 1.09                     | 1.11      | 47.37            | m    |      | 2        | 6.35+7.05=13.40     | 1.07                     | 1.11      | 47.40            | m    |
|      | 3        | 4.82+8.78=13.59     | 1.09                     | 1.82      | 35.43            | sm   |      | 3        | 4.88+8.36=13.24     | 1.06                     | 1.71      | 36.83            | sm   |
|      | 4        | 4.02+7.52=11.54     | 0.92                     | 1.87      | 34.84            | sm   |      | 4        | 5.15+6.37=11.52     | 0.92                     | 1.24      | 44.74            | m    |
|      | 5        | 5.15+6.20=11.35     | 0.91                     | 1.20      | 45.37            | m    |      | 5        | 4.14+7.15=11.29     | 0.90                     | 1.73      | 36.68            | sm   |
|      | 6        | 4.73+5.73=10.45     | 0.84                     | 1.21      | 45.22            | m    |      | 6        | 5.05+5.84=10.89     | 0.87                     | 1.16      | 46.38            | m    |
|      | 7        | 4.23+5.63=9.86      | 0.79                     | 1.33      | 42.92            | m    |      | 7        | 4.41+5.73=10.15     | 0.81                     | 1.30      | 43.50            | m    |
|      | 8        | 4.06+5.49=9.54      | 0.76                     | 1.35      | 42.50            | m    |      | 8        | 4.23+5.58=9.82      | 0.79                     | 1.32      | 43.13            | m    |
| NY1  | 1        | 8.44+13.25=21.70    | 1.74                     | 1.57      | 38.91            | m    | PD3  | 1        | 7.92+11.38=19.30    | 1.54                     | 1.44      | 41.03            | m    |
|      | 2        | 6.53+7.32=13.86     | 1.11                     | 1.12      | 47.15            | m    |      | 2        | 6.65+7.22=13.87     | 1.11                     | 1.09      | 47.93            | m    |
|      | 3        | 4.32+8.38=12.71     | 1.02                     | 1.94      | 34.02            | sm   |      | 3        | 4.99+8.46=13.45     | 1.08                     | 1.70      | 37.10            | sm   |
|      | 4        | 4.90+6.23=11.13     | 0.89                     | 1.27      | 44.03            | m    |      | 4        | 5.56+6.19=11.75     | 0.94                     | 1.11      | 47.33            | m    |
|      | 5        | 3.77+7.34=11.12     | 0.89                     | 1.94      | 33.96            | sm   |      | 5        | 4.40+7.11=11.51     | 0.92                     | 1.62      | 38.23            | m    |
|      | 6        | 4.95+5.64=10.60     | 0.85                     | 1.14      | 46.75            | m    |      | 6        | 4.86+5.86=10.73     | 0.86                     | 1.21      | 45.35            | m    |
|      | 7        | 4.23+5.36=9.59      | 0.77                     | 1.27      | 44.10            | m    |      | 7        | 4.37+5.49=9.86      | 0.79                     | 1.26      | 44.28            | m    |
|      | 8        | 3.82+5.53=9.36      | 0.75                     | 1.42      | 40.85            | m    |      | 8        | 4.27+5.26=9.52      | 0.76                     | 1.23      | 44.81            | m    |

Note: Relative length (%) =  $100 \times \text{chromosome length} / \text{total complement length}$ . Arm ratio = length of the long arm / length of the short arm. m: metacentric; sm: submetacentric.

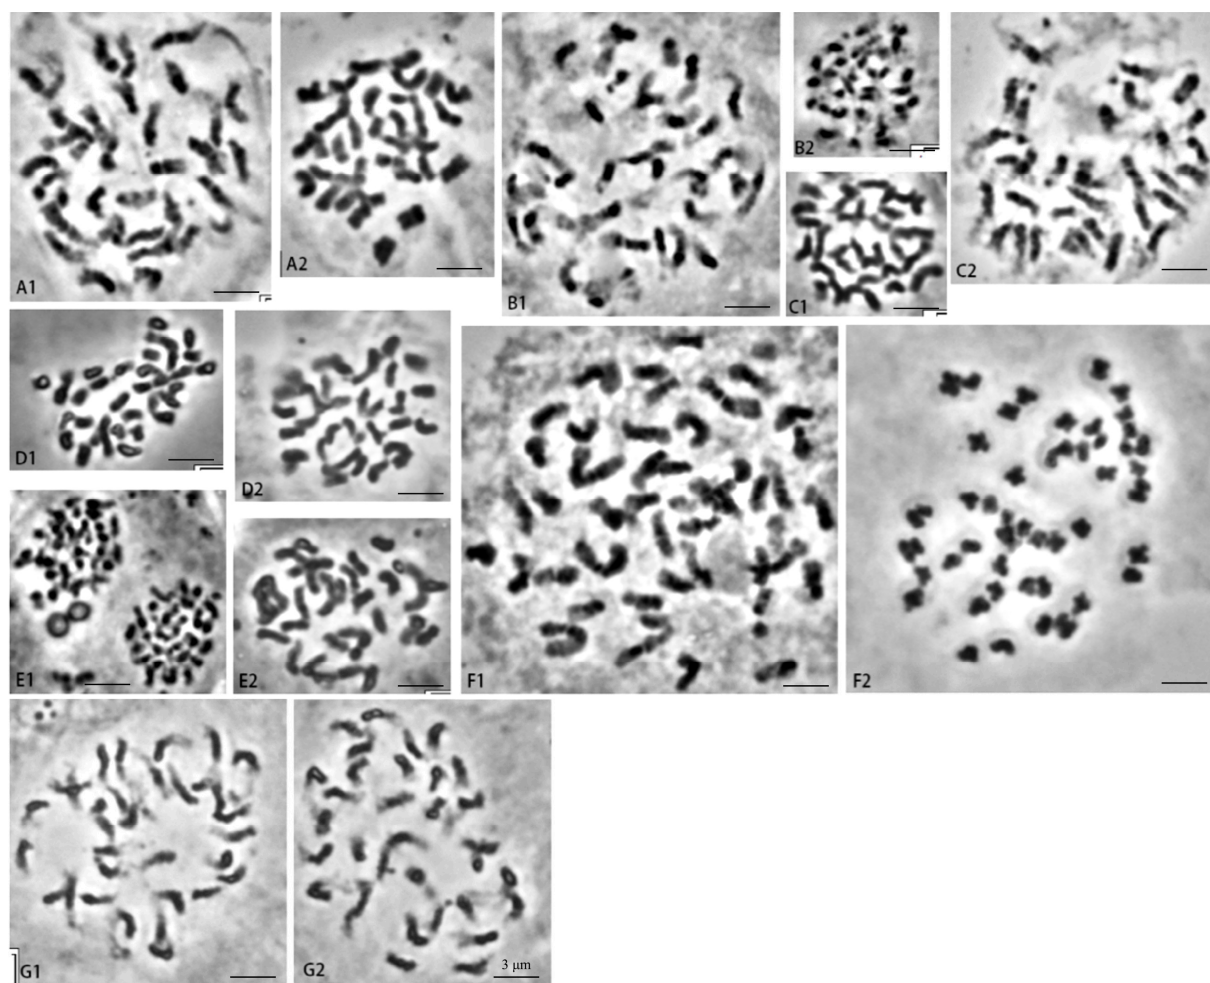

**Figure S1.** Chromosome number ( $2n$ ) of parental trees in Chinese cherry. **A:** Xichang 1 ( $4x = 32$ ), **B:** Bjjie 7 ( $4x = 32$ ), **C:** Bazhong ( $4x = 32$ ), **D:** Taihe 2 ( $4x = 32$ ), **E:** Nayong 1 ( $4x = 32$ ), **F:** Puding 3 ( $6x = 48$ ), **G:** Luoyang 4 ( $4x = 32$ ). Scale bar represents 3  $\mu\text{m}$ .

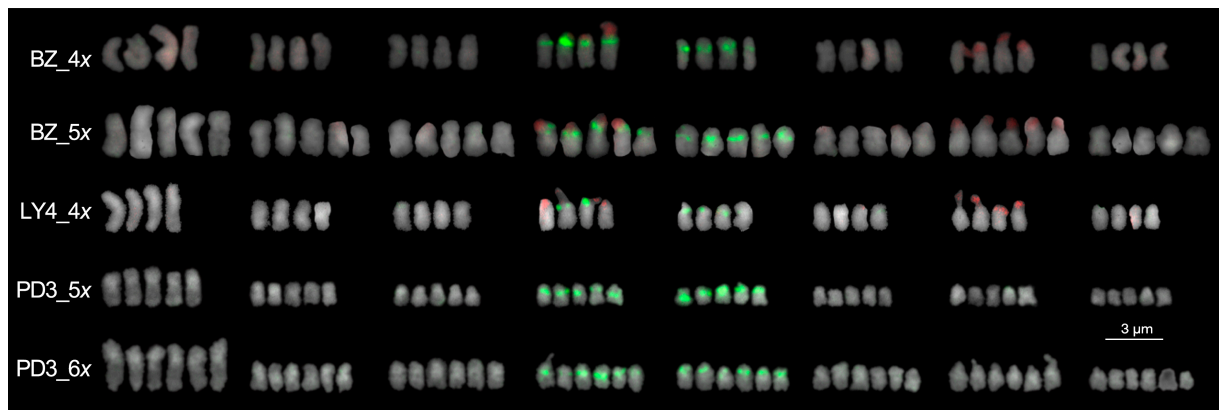

**Figure S2.** 5S rDNA-FISH on metaphase chromosomes in polyploid Chinese cherry. Green signals indicate 5S rDNA sites. Scale bar represents 3 μm.

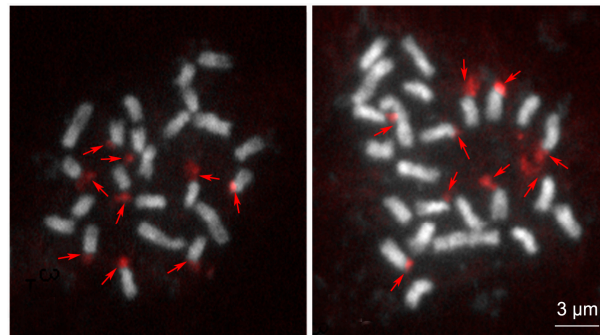

**Figure S3.** 45rDNA-FISH on metaphase chromosomes in a triploid flowering cherry (Nanjing 2). Red arrows indicate 45S rDNA sites. Scale bar represents 3  $\mu\text{m}$ .
